# Supplementary material for: Hybrid microtubes of polyoxometalate and fluorescence dye with tunable photoluminescence
Source: Royal Society of Chemistry journal article supplement (doi:10.1039/c2cc00132b), 2012-01-01
Supplement: c2cc00132b.pdf [file c2cc00132b.pdf]

Supplementary Materials for:  
**Hybrid Microtubes of Polyoxometalate and Fluorescence  
Dye with Tunable Photoluminescence**

Huanqiu Zhang<sup>a</sup>, JunPeng<sup>a\*</sup>, Yan Shen<sup>a</sup>, Xia Yu<sup>a</sup>, Fang Zhang<sup>a</sup>, Jilan Mei<sup>a</sup>, Bin Li<sup>b</sup> and Liming Zhang<sup>b</sup>

<sup>a</sup>Key Laboratory of Polyoxometalate Science of Ministry of Education, Faculty of Chemistry, Northeast Normal University, Changchun, Jilin, 130024, People's Republic of China

<sup>b</sup>State Key Laboratory of Luminescence and Applications, Changchun Institute of Optics Fine Mechanics and Physics, Chinese Academy of Sciences, Changchun, 130033, P. R. China.

### 1. Chemicals and measurements

HCl and fluorescein sodium (FS) were used as received. Monolacunary tungstosilicate  $\alpha$ -K<sub>8</sub>[SiW<sub>11</sub>O<sub>39</sub>] ( $\alpha$ -SiW<sub>11</sub>) was synthesized according to the published procedure.<sup>[1]</sup> All reagents were used as received without further purification. All the aqueous solutions were prepared using de-ionized water.

Elemental analyses were carried out on a Euro Vector EA 3000 and Vario EL instruments. SEM images were taken with a XL30 field emission environmental scanning electron microscope (ESEM-FEG). FT-IR spectra were measured on a D/MAX-IIIC spectrometer. Powder XRD patterns were recorded with a D/max-IIIC diffractometer. Thermogravimetric analysis measurements (TG) were performed with a Perkin-Elmer TGA7 instrument. UV/Vis spectra were captured on 756 CRT and Cary 500 UV-Vis-NIR spectrophotometer. Fluorescence spectra were measured on an FLSP920 Edinburgh Fluorescence Spectrometer. The fluorescent stability was

performed with a HITACHI F-7000 fluorescence spectrophotometer. Fluorescence microscopy images were obtained with an Olympus FV-1000 confocal laser scanning microscope with mercury lamp as excitation source, using CCD scanning (objective lens 20 times).

## 2. Control experiment for chemically synthesized $\text{SiW}_{12}\text{-F}$ and physically dyed $\text{SiW}_{12}/\text{F}$ microtubes

To make a comparison between the chemically synthesized  $\text{SiW}_{12}\text{-F}$  microtubes and the physically dyed  $\text{SiW}_{12}/\text{F}$  microtubes, a control experiment was designed. Pre-synthesized  $\text{SiW}_{12}$  microtubes<sup>[2]</sup> were dipped into a fluorescein sodium solution of  $\text{pH}=1$ , then dried in air to obtain physically dyed ( $\text{SiW}_{12}/\text{F}$ ) microtubes. The microscope images of the products show that the color of  $\text{SiW}_{12}\text{-F}$  microtubes is well spread, but  $\text{SiW}_{12}/\text{F}$  microtubes are not dyed evenly (**Fig. S1**). These facts reveal that F dye is doped into the crystal structure of the  $\text{SiW}_{12}$  microtubes during chemical synthesis of  $\text{SiW}_{12}\text{-F}$  microtubes.

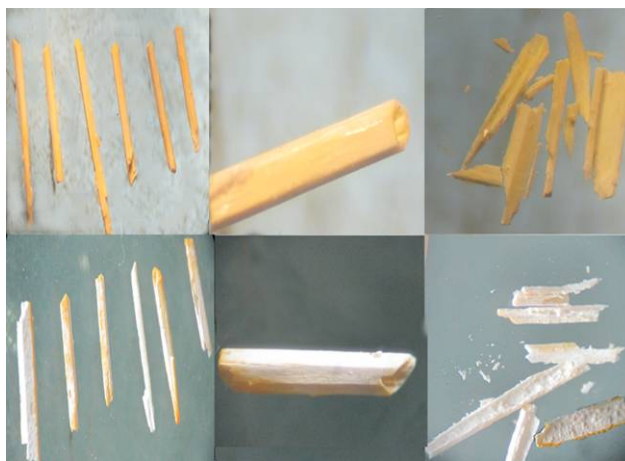

**Fig. S1.** Microscope images for (top) chemically synthesized  $\text{SiW}_{12}\text{-F}$  and (bottom) physically dyed  $\text{SiW}_{12}/\text{F}$  microtubes.

## 3. Preparation of other fluorescent microtubes

The preparation of other fluorescent microtubes is as for the procedure for SiW<sub>12</sub>-F microtubes except for variation of fluorescent dyes: Fluorescent Green 4A (0.0160 g); Fluorescent Red XD (0.056 g); Fluorescent Violet XD (0.0040 g); Fluorescein GG (0.0114 g); Fluorescent Green 10G (0.0020 g); Methyl violet ethanol solution (2 mL of  $7.1 \times 10^{-4}$  M); Invisible Fluorescent Blue (0.0400 g) and Fluorescent Blue XD (0.0190 g). Optical micrograph images of the products are shown in **Fig. S3**.

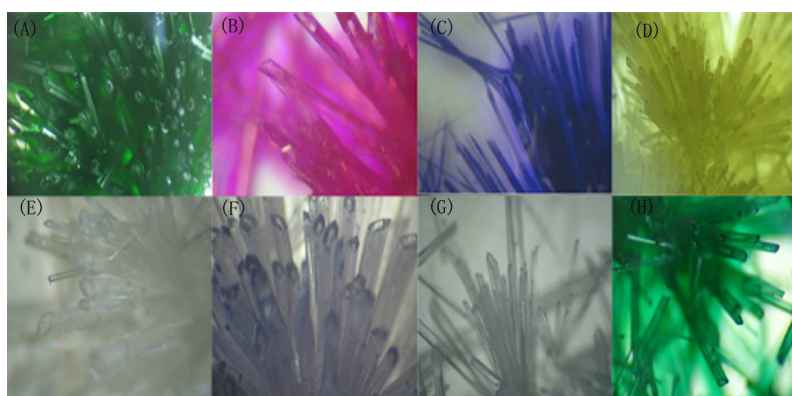

**Fig. S2.** Optical micrograph images of the other fluorescent microtubes: (A) Fluorescent Green 4A; (B) Fluorescent Red XD; (C) Fluorescent Violet XD; (D) Fluorescein GG; (E) Fluorescent Green 10G; (F) Methyl Violet; (G) Invisible Fluorescent Blue; (H) Fluorescent Blue XD.

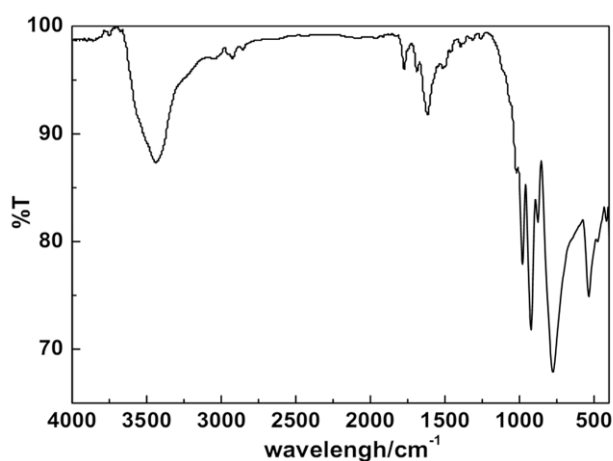

**Fig. S3.** FT-IR spectrum obtained from SiW<sub>12</sub>-F microtubes.

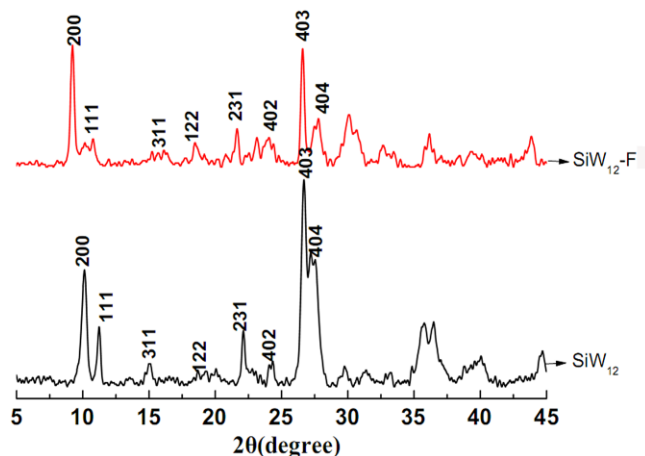

**Fig. S4.** XRD spectra obtained from SiW<sub>12</sub>-F and SiW<sub>12</sub> microtubes.

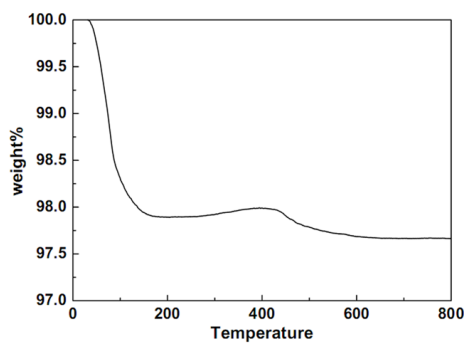

**Fig. S5.** TG curve obtained from SiW<sub>12</sub>-F microtubes.

The TG measurement of SiW<sub>12</sub>-F microtubes shows the initial weight loss of 2.09 % from 30-150 °C, corresponding to the loss of four water molecules. The final weight loss of 0.246 % in the region of 420-500 °C indicates the removal of organic F moiety. Weight loss calculations give an empirical ratio SiW<sub>12</sub>: F of 1: 0.02, consistent with the element analysis results.

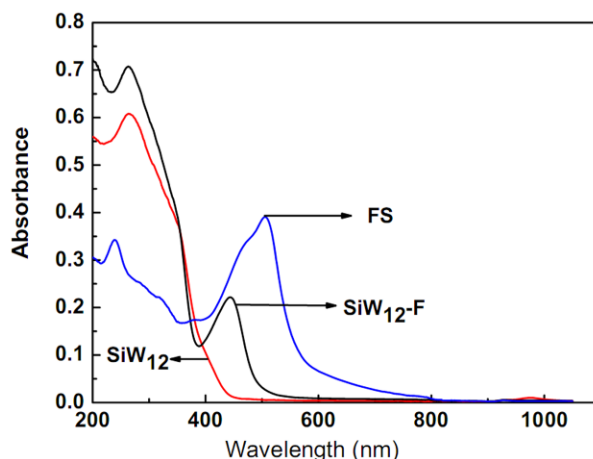

**Fig. S6.** Solid UV-Vis spectra obtained from FS powder, SiW<sub>12</sub>-F and SiW<sub>12</sub> microtubes.

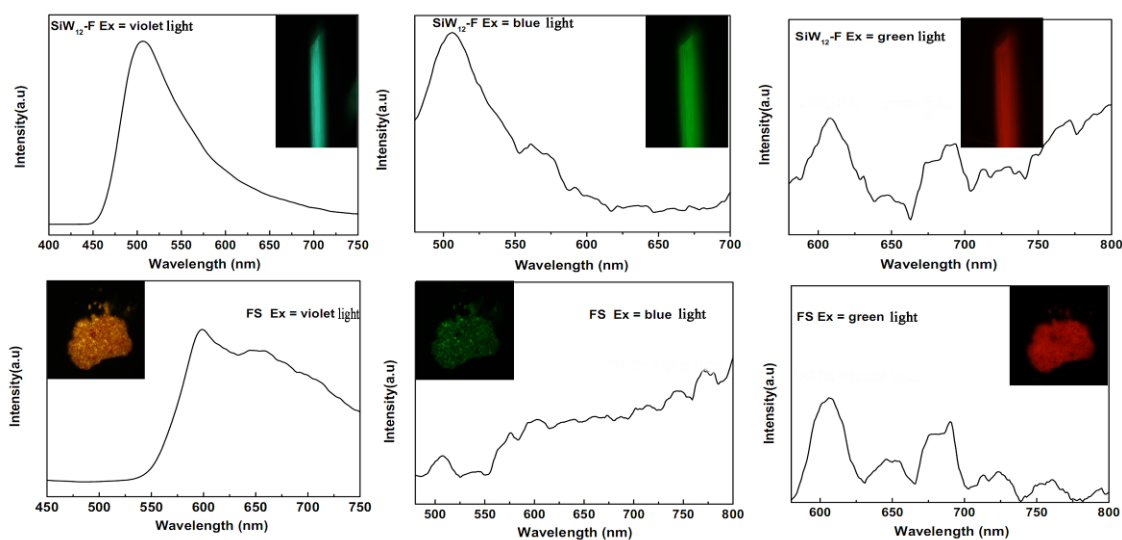

**Fig. S7.** Solid-state fluorescence emission spectra obtained from the SiW<sub>12</sub>-F microtubes at room temperature by variation of excitation light (Ex), at 380 nm corresponding to violet light; at 458 nm corresponding to blue light; at 550 nm corresponding to green light. The insets are the fluorescence microscopy images of an individual SiW<sub>12</sub>-F microtube (up) and FS powder (bottom). The light source is violet, blue and green light from left to right, respectively.

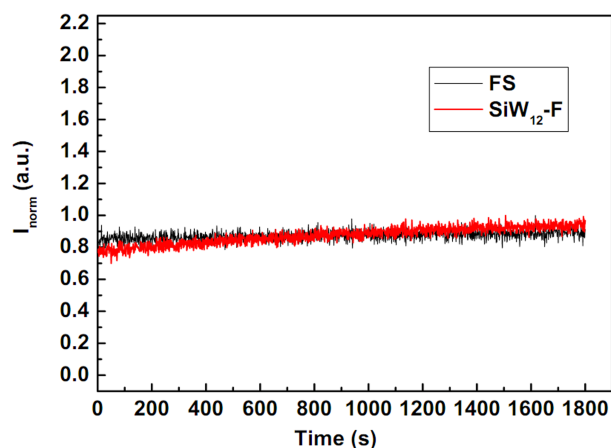

**Fig. S8.** Time-scan fluorescence spectra obtained from SiW<sub>12</sub>-F microtubes (excitation at 380 nm, emission at 508 nm) and FS (excitation at 350 nm, emission at 650 nm for FS).

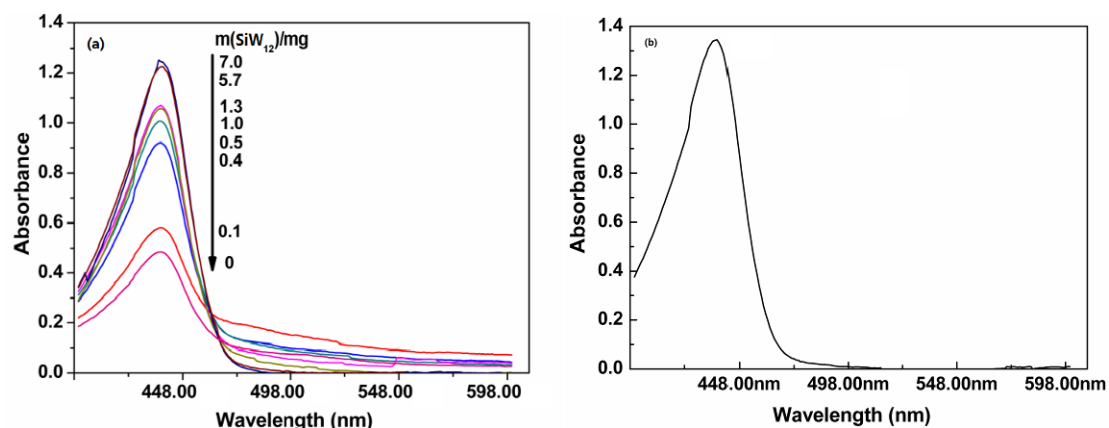

**Fig. S9.** Visible absorption spectra obtained from a 3 mL solution containing  $1.33 \times 10^{-5}$  molmL<sup>-1</sup> FS (pH=1): (a) under the irritation by daylight for 8h in the presence of SiW<sub>12</sub> (up to down: SiW<sub>12</sub>= 7.0 mg, 5.7 mg, 1.3 mg, 1.0 mg, 0.5 mg, 0.4 mg, 0.1 mg and 0 mg); (b) in the dark (SiW<sub>12</sub>= 0 mg). The m(SiW<sub>12</sub>) means the mass of SiW<sub>12</sub> microtubes.

- [1] C. Rocchiccioli-Deltcheff, M. Fournier, R. Franck and R. Thouvenot., *Inorg. Chem.*, 1983, **22**, 207.
- [2] Z. F. Xin, J. Peng, T. Wang, B. Xue, Y. M. Kong, L. Li and E. B. Wang, *Inorg. Chem.*, 2006, **45**, 8856.
